# Supplementary material
Source: Springer Nature journal article supplement (https://www.springermedizin.de/resource/supplementary/13561_2013_56_MOESM1_ESM.pdf/9687330)

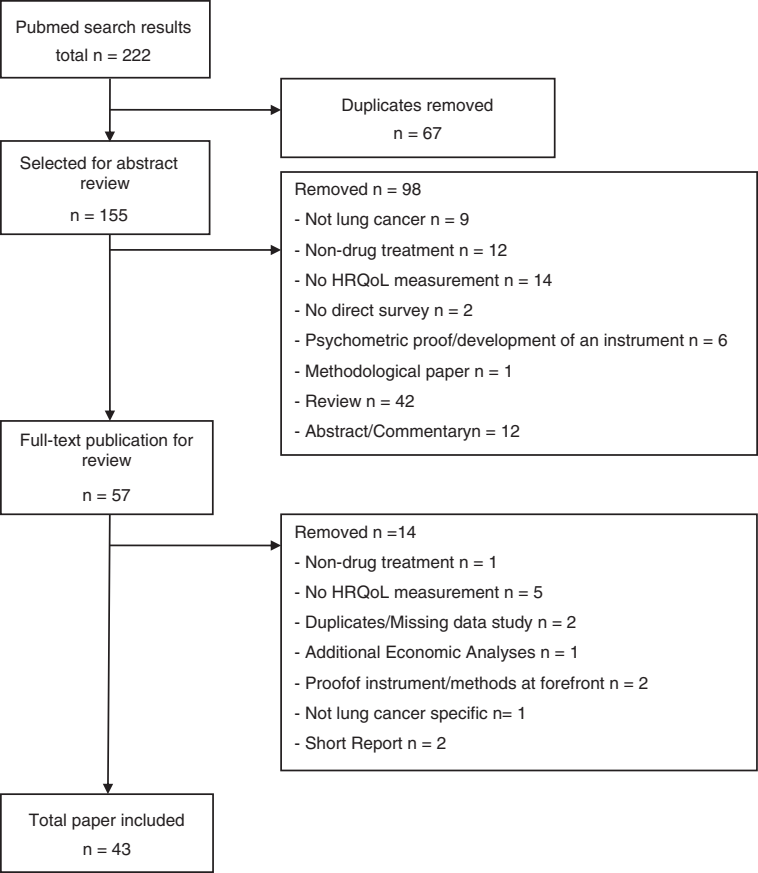

Supplement: MOESM1 [file 9687330]
